# Supplementary material
Source: HighWire-hosted journal article supplement (https://openheart.bmj.com/content/8/1/e001569)
Supplement: inline-supplementary-material-4 [file inline-supplementary-material-4.pdf]

**Supplementary Material S4.** Standardised cognitive test-scores of patients before and after CABG

| <b>Test</b>   | <b>Preoperative<br/>(n = 142)</b> | <b>3 days<sup>1</sup><br/>(n = 134)</b> | <b>6 months<br/>(n = 131)</b> | <b>p-value<sup>2</sup></b> |
|---------------|-----------------------------------|-----------------------------------------|-------------------------------|----------------------------|
| DET; speed    | 101.8 ± 6.2                       | 98.1 ± 8.4                              | 100.5 ± 8.3                   | 0.07                       |
| IDN; speed    | 100.6 ± 4.8                       | 98.2 ± 6.3                              | 100.8 ± 5.5                   | 0.26                       |
| OCL; accuracy | 103.6 ± 8.7                       | 100 ± 9.0                               | 104.5 ± 9.4                   | 0.58                       |
| ONB; speed    | 98.3 ± 5.6                        | 95.6 ± 6.2                              | 97.5 ± 5.8                    | 0.08                       |

<sup>1</sup>Five patients did not complete the test. <sup>2</sup>paired T-test only from patients with complete dataset; P-value based on preoperative and 6 months scores. DET:detection task; IDN:identification task, OCL:one card learning task; ONB:one back task. All numbers are presented as mean with standard deviation.
