# Supplementary material
Source: HighWire-hosted journal article supplement (https://openheart.bmj.com/content/8/1/e001569)
Supplement: inline-supplementary-material-5 [file inline-supplementary-material-5.pdf]

**Supplementary Material S5.** Quality of life of patients before and after CABG –subscale scores

| Scores                          | Preoperative<br>(n = 140) | 6 months<br>(n = 131) | P value          |
|---------------------------------|---------------------------|-----------------------|------------------|
| <b>Physical component score</b> | <b>63.4 ±19.9</b>         | <b>73.0 ±17.4</b>     | <b>&lt;0.001</b> |
| General health                  | 64.0 ±17.4                | 65.7 ±17.3            | 0.24             |
| Physical functioning            | 64.9 ±27.1                | 79.4 ±20.2            | <0.001           |
| Role physical                   | 57.4 ±30.2                | 64.3 ±29.0            | 0.009            |
| Bodily pain                     | 70.5 ±25.1                | 83.1 ±20.5            | <0.001           |
| <b>Mental component score</b>   | <b>70.6 ±20.4</b>         | <b>74.6 ±18.7</b>     | <b>0.018</b>     |
| Mental health                   | 74.7 ±19.2                | 78.3 ±18.1            | 0.012            |
| Vitality                        | 61.6 ±23.9                | 63.6 ±19.9            | 0.29             |
| Social functioning              | 74.3 ±26.7                | 81.6 ±21.2            | 0.001            |
| Role emotional                  | 74.6 ±25.7                | 75.5 ±26.9            | 0.68             |

All numbers are presented as mean with standard deviation.

For a few patients not all scores on all subscales are known.
