# Supplementary material
Source: HighWire-hosted journal article supplement (https://openheart.bmj.com/content/8/1/e001569)

**Supplementary Material S6.** Difference in QoL of CABG-patients with and without POCD: physical and mental component score

A Physical Component Score

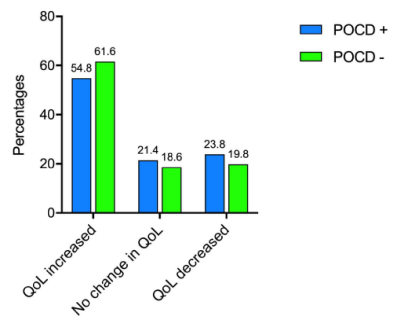

A Mental Component Score

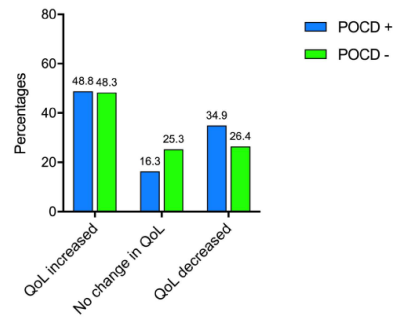

Supplement: inline-supplementary-material-6 [file inline-supplementary-material-6.pdf]
